# Supplementary material for: Contraceptive Options and Their Associated Estrogenic Environmental Loads: Relationships and Trade-Offs
Source: PLoS One. 2014 Mar 26;9(3):e92630. doi: 10.1371/journal.pone.0092630 (PMC3966801; doi:10.1371/journal.pone.0092630)
Supplement: File S10 — Changes in Flows of Estrogens When Users of EE2-OC Switch to Male Condoms. (DOC) [file pone.0092630.s010.doc]

# S10 Changes in Flows of Estrogens When Users of EE2-OC Switch to Male Condoms

#
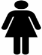

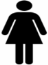

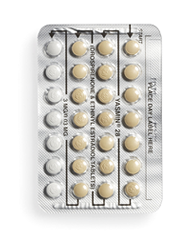

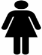


21212121

**Failures**


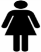

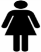

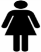

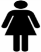

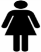

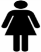

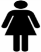

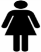

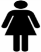

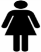

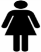

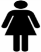


**Ectopic**

**1.8**

**Abortions**

**82.0**

**Fetal Losses**

**30.3**

**Mistimed Births**

**39.6**

**Unwanted Births**

**26.4**

**Unwanted Legacy**

**26.4**

21212121

**E2-eq**

**55.5**

**Male Condom**

21212121

21212121

**Unwanted Legacy**

**13.2**

**Failures**

**Metabolic**

**Loss**


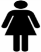

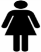

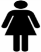

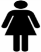

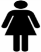

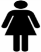

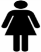

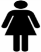

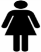

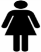

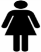

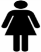


21212121

21212121

21212121

**Ectopic**

**0.9**

**Abortions**

**41.0**

**Fetal Losses**

**15.2**

**Mistimed Births**

**19.8**

**Unwanted Births**

**13.2**

**Status quo Scenario**

21212121

21212121

**EE2**

**21**

**(22,24)**

**Legend**

21212121

**E2-eq**

**62**

**EEE2-OC**

**Ps**

1, 000

**Contraceptive Profile Adopted**

**100% Male Condoms**

**Unintended**

**Pregnancies**

180

**EMC**

**E2-eq**

**65**

**Unintended**

**Pregnancies**

90

**E3**

**23**

**(17, 28)**

**E2**

**2.2**

**(1.7, 2.7)**

**E1**

**4.5**

**(3.5, 5.5)**

(22,24)

**E2-eq**

**4.6**

**(2.0,5.2)**

**Ps**

1, 000

**E2-eq**

**29.5**

**(27,32)**

**Pre-Treatment Associative Loads**

**EE2**

**2.95**

**(2.7, 3.2)**

**E2-eq**

**27.7**

**Contraceptive Profile**

**100%** EE2-OC

**EE2 used**

7.9 g/yr

**E1**

**8.9**

**(6.5, 11)**

(22,24)

**E2**

**4.4**

**(3.3,5.3)**

**E3**

**45**

**(34, 56)**

**25%, 75%**

**Percentile**

**Expressed as**

**Grams/year**

**E2-eq**

**9.2**

**(7.9,10.4)**

**Figure S1: Changes in** **associative loads of steroidal estrogens when a unit of population of 1,000 first-year EE2-OC users switches entirely to the use of male condoms.** *EEE2-OC*was estimated using Eq. (S6), while *EMC* was estimated using the appropriately modified version of Eq. (S7).
